# Supplementary material for: WC@meso-Pt core–shell nanostructures for fuel cells
Source: Royal Society of Chemistry journal article supplement (doi:10.1039/c3cc46595k), 2013-01-01
Supplement: c3cc46595k.pdf [file c3cc46595k.pdf]

## Electronic Supplementary Information (ESI)

### WC@*meso*-Pt core-shell nanostructures for fuel cells

5 Zhao-Yang Chen,<sup>a</sup> Chun-An Ma,<sup>\*a,b</sup> You-Qun Chu,<sup>a</sup> Jia-Mei Jin,<sup>b</sup> Xiao Lin,<sup>b</sup> Christopher Hardacre<sup>b</sup> and Wen-Feng Lin<sup>\*b</sup>

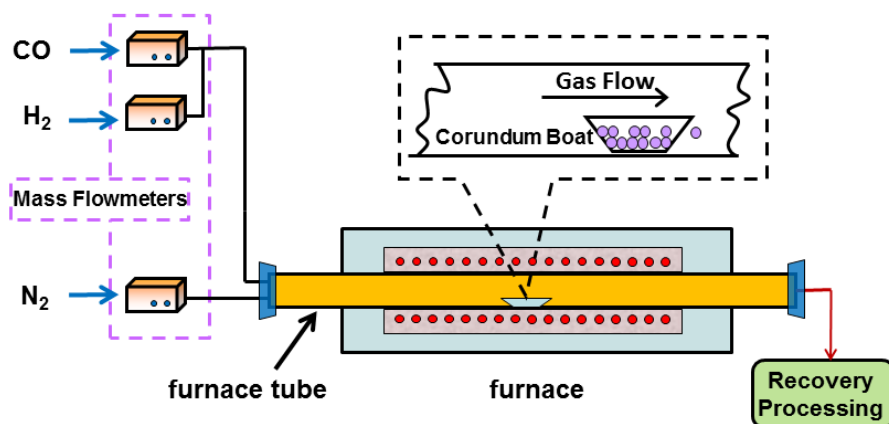

10

**Figure S1.** Schematic diagram of the setup used for the gas-solid reaction for the synthesis of WC@Cu.

#### Experimental details

A mixture of ammonium meta tungstate (AMT, (NH<sub>4</sub>)<sub>2</sub>W<sub>4</sub>O<sub>13</sub>·xH<sub>2</sub>O) and Cu(NO<sub>3</sub>)<sub>2</sub>·3H<sub>2</sub>O (W/Cu wt: 4:1) was added  
15 to de-ionized water at 17 weight percent. It was then treated by spray drying (BÜCHI Spray Dryer B-290) to produce  
micro-sized spherical precursor. During the drying process in a spray desiccator, the rate of hot air flow was 35 m<sup>3</sup> h<sup>-1</sup>,  
the temperature of the air at the nozzle was 185 °C; the rate of evaporation of aqueous solution was 15 ml min<sup>-1</sup>, and  
the temperature of the mixture of gas and powder at the exit was 92~95 °C. This sample underwent the gas-solid  
reaction (Figure S1) under an atmosphere of CO/H<sub>2</sub>. The flow rates of CO and H<sub>2</sub> were 125 cm<sup>3</sup> min<sup>-1</sup> and 250 cm<sup>3</sup>  
20 min<sup>-1</sup>, respectively. Initially, furnace temperature was raised to 400 °C and maintained for 1 h after the reaction zone  
was free from oxygen. Thereafter, the temperature was raised to 800 °C and maintained for 4 h. The sample was  
cooled to room temperature at the end of the reaction. Replacement of the Cu by Pt was carried out in H<sub>2</sub>PtCl<sub>6</sub>  
solution (5 mmol L<sup>-1</sup>, 10% Pt loading) at 50 °C for 6 h. The electrocatalytic properties of the WC@Pt were analyzed  
by employing the powder micro electrode (PME, 60µm in diameter) approach at room temperature. The structure and  
25 preparation of the PME have been described previously.<sup>1</sup> The WC@*m*-Pt sample was ground and inserted into the  
lower tip of the electrode.<sup>2</sup> Cyclic voltammetry of WC@Pt was carried out using an electrochemical station (CHI-

660c), where oxidation current is defined as positive current. Each stage contains 5 cycles. Pt foil and saturated calomel electrode (SCE) were used as counter and reference electrodes, respectively.

The phases present in the synthesized material was identified using XRD (Panalytical X'Pert Pro, Cu K $\alpha$ 1 radiation source ( $\lambda=0.1541$  nm), voltage of 40 kV, current of 40 mA). The morphology and structure of the products were characterized using FE-SEM (Hitachi S-4700 II, using carbon conductive adhesive) and TEM (Tecnai G2 F30, Ni grid) and HR-TEM with EDS. The specific surface area of the sample pores were measured by nitrogen adsorption-desorption analyse (Micromeritics ASAP 2020).

1. C. A. Ma, J. F. Sheng, N. Brandon, C. Zhang, G. H. Li, *Int. J. Hydrogen Energy* 2007, 32, 2824.
2. C. Cachet-Vivier, V. Vivier, C. S. Cha, J.-Y. Nedelec, L. T. Yu, *Electrochim. Acta.* 2001, 47, 181.

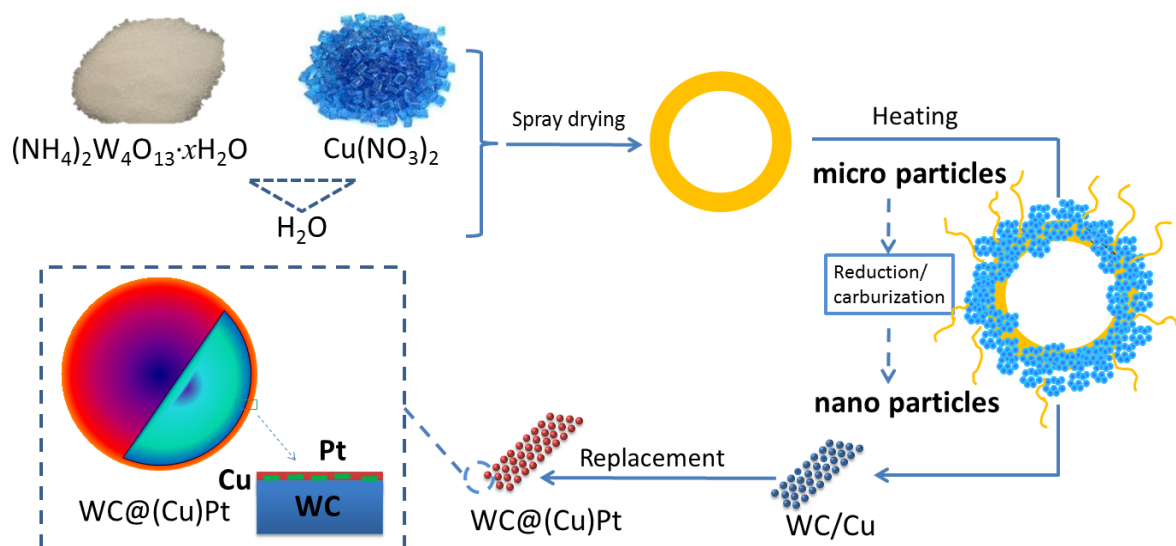

5 **Figure S2.** Schematic of the synthesis process of core-shell WC@(Cu)Pt.

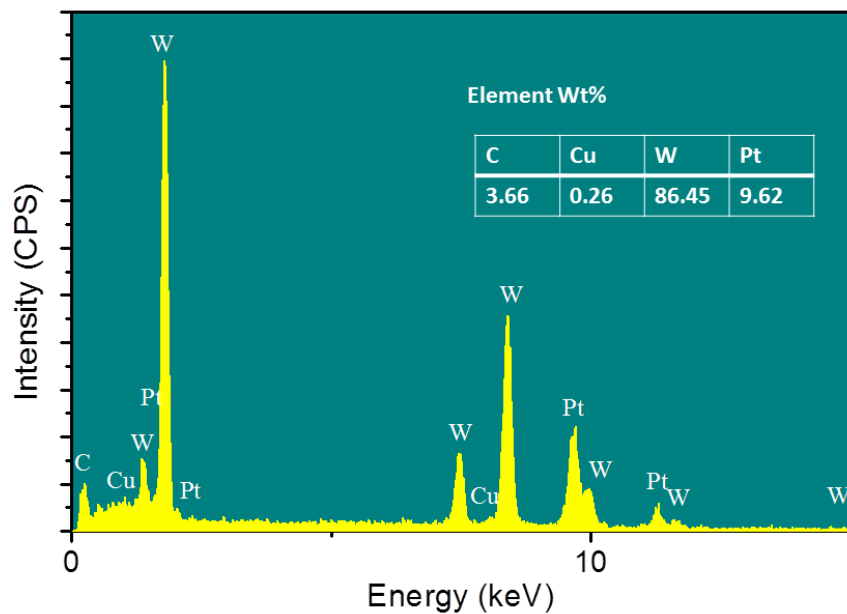

**Fig. S3.** Energy dispersive X-ray spectroscopy (EDS) spectrum and the elemental analysis of the WC@(Cu)Pt sample.

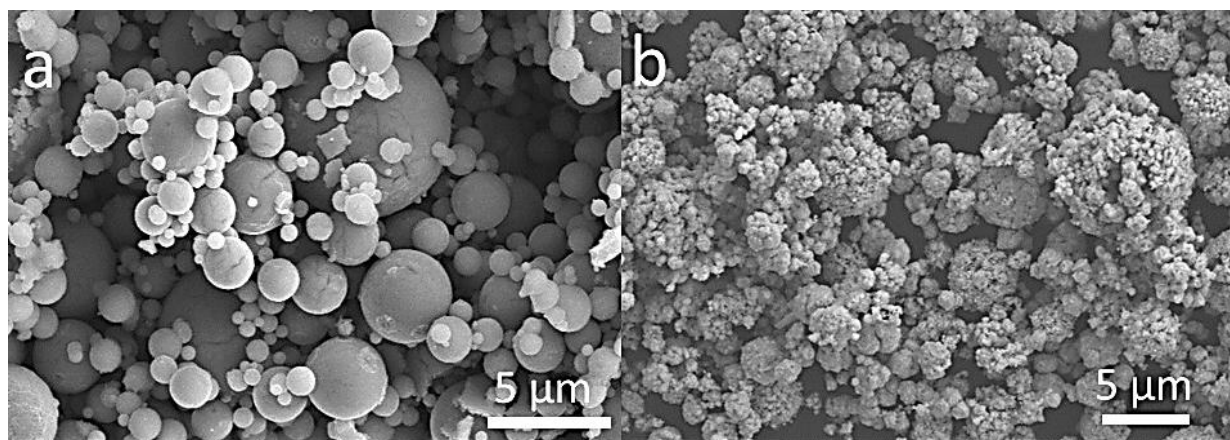

**Fig. S4.** SEM images for the precursor (a) and the resultant sample (b) of a parallel experiment without the addition of copper nitrate.

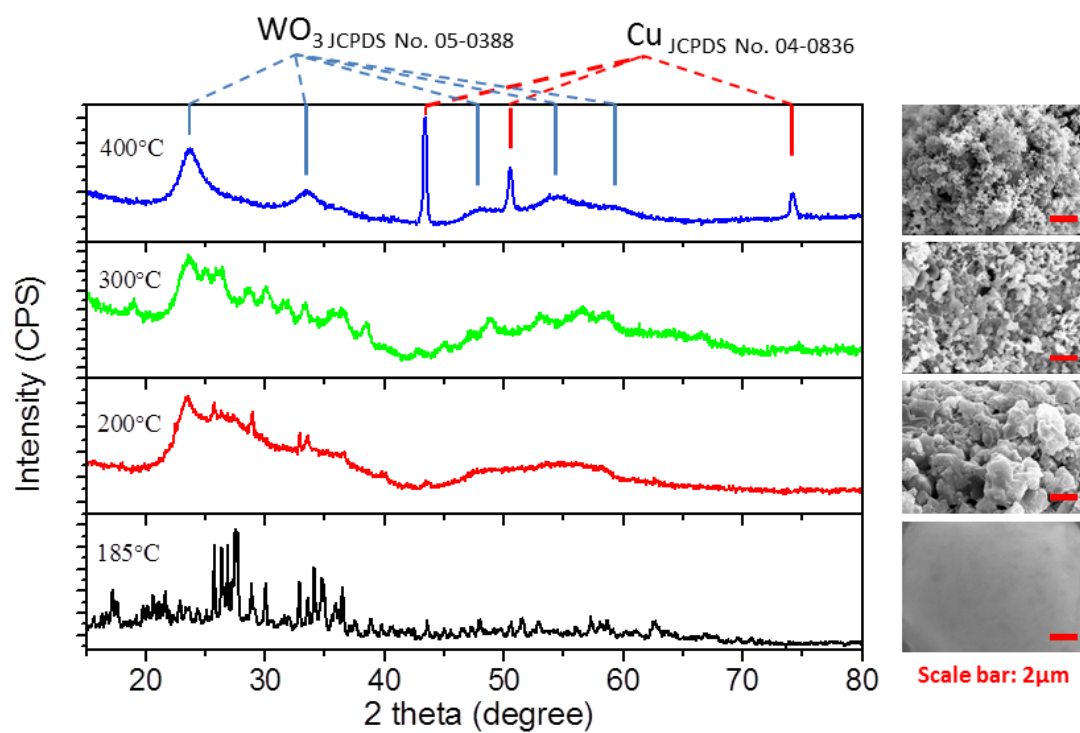

5

**Fig. S5.** XRD patterns and SEM images of the sample taken out at different temperatures during the heating process.

10

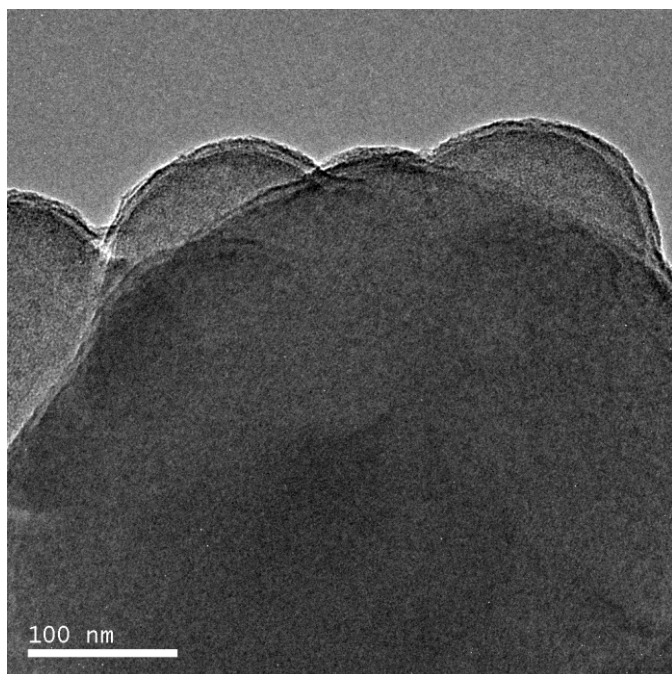

Fig. S6. TEM image of the sample taken out at 210 °C during the spray drying process.

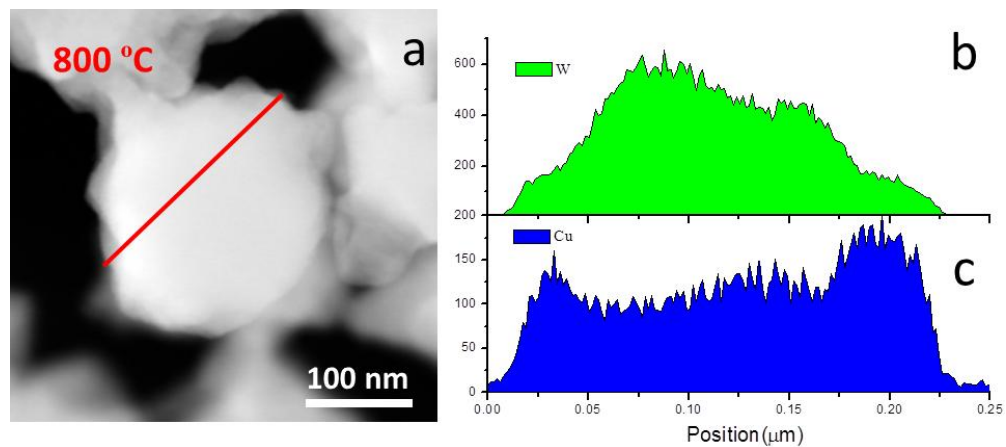

5

**Fig. S7.** (a) TEM image of the sample taken out at 800 °C during the heating process/gas-solid reactions, and (b and c) the corresponding EDS line-scan analysis of the profiles of W and Cu along the selected line across a sample particle.

10



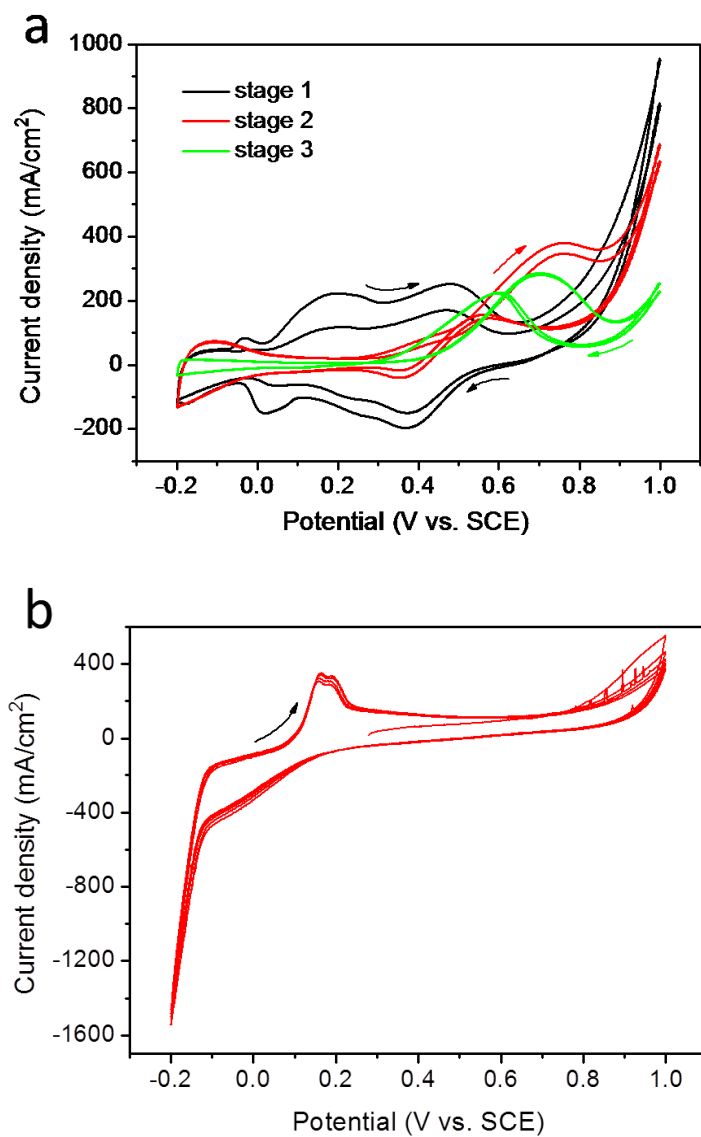

5 **Fig. S8.** (a) CVs showing the 3 stages of WC@(Cu)Pt in 2M CH<sub>3</sub>OH + 1M H<sub>2</sub>SO<sub>4</sub> solution with a scan rate of 50mV s<sup>-1</sup> at 25°C; (b) the CVs of WC@Cu cycled 5 times under the same conditions.

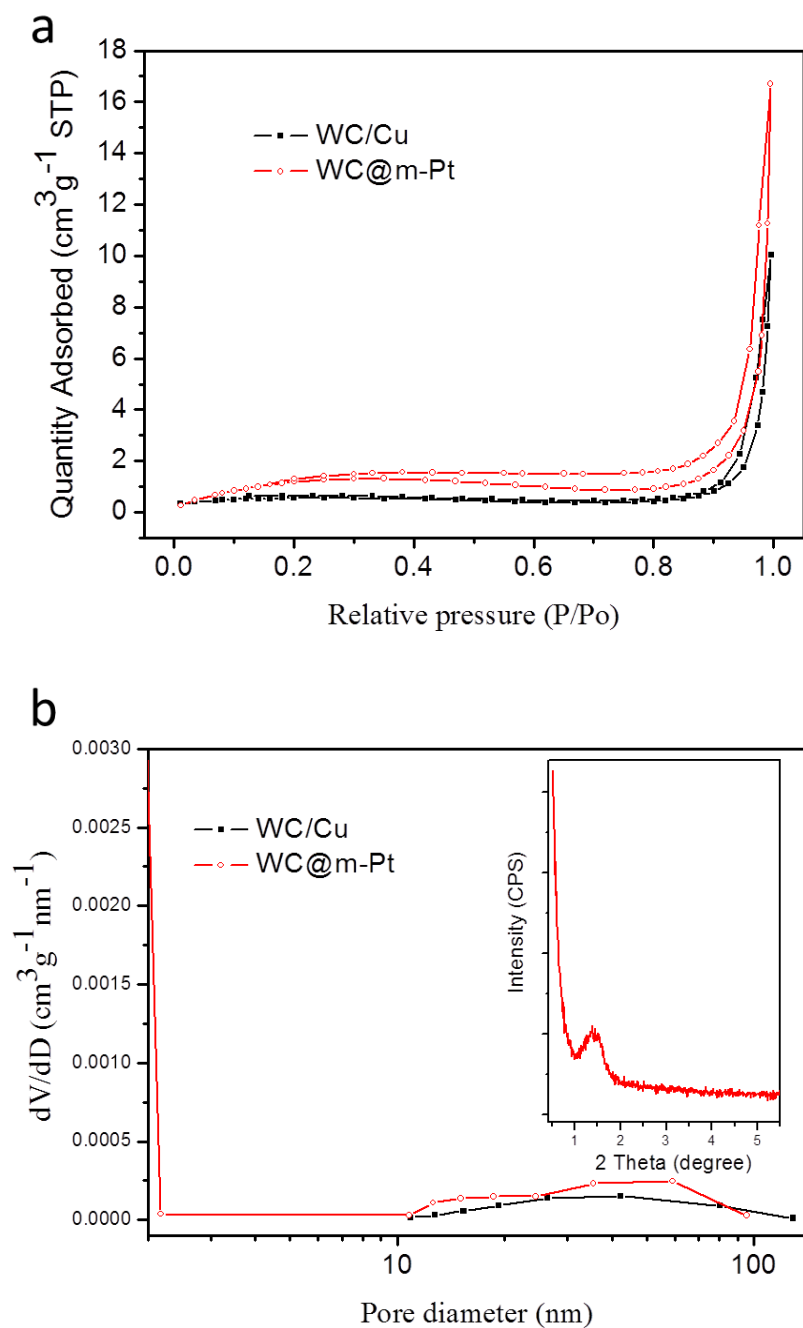

**Fig. S9.** (a) N<sub>2</sub> sorption isotherms and (b) the corresponding pore-size-distribution curves of WC/Cu and WC@m-Pt (inset is the small-angle XRD pattern of WC@m-Pt).
